# Supplementary material
Source: ML conference proceedings conference paper supplement (https://aclanthology.org/P19-1155)
Supplement: Software [file P19-1155.Software.zip]

| Hyperparameter Name | Description                                                                                         | Values Tested               |
|---------------------|-----------------------------------------------------------------------------------------------------|-----------------------------|
| rand_reset          | whether activations in the model reset to a random state (True), or to zero (False) after each word | <b>True</b> , False         |
| lr                  | initial learning rate                                                                               | 0.1, 0.5, <b>1.0</b> , 2.0  |
| anneal_factor       | amount by which to anneal learning rate, if no improvement found                                    | 0, <b>0.25</b> , 0.5, 1.0   |
| patience            | number of training epochs to wait for validation loss to improve before updating weights            | <b>0</b> , 2, 4             |
| dropout             | proportion of weights to keep fixed                                                                 | 0, <b>0.2</b> , 0.5         |
| epochs              | number of epochs (complete passes through the data) to train for                                    | <b>25</b> , 50, 100         |
| nlayers             | number of recurrent layers                                                                          | 1, <b>2</b> , 4             |
| nhid                | number of nodes in each recurrent layer                                                             | 128, 256, <b>512</b> , 1250 |

Table A1: Particulars of hyperparameter testing. Hyperparameters were optimized for speed and likelihood assigned to the validation set. Optimal parameters for the validation set are bolded, and were used in the experiments reported here.
